# Supplementary material for: Why can people with developmental prosopagnosia recognise some familiar faces? Insights from subjective experience
Source: PeerJ. 2023 Jul 18;11:e15497. doi: 10.7717/peerj.15497 (PMC10361072; doi:10.7717/peerj.15497)
Supplement: Supplemental Information 2 [file peerj-11-15497-s002.xlsx]

## Sheet: responses to section 1 and 2
Pt_Number	S1Q1: Are you able to successfully recognise faces using compensatory cues to identity (e.g. your recognition of the faces is not "automatic" but you are able to work out who the person is using cues such as context, hairstyle or accessories)?	S1Q2: For those individuals that you can recognise using compensatory cues, are these cues successful all of the time?	S1Q3:Why do you think that your strategies sometimes fail? (use of compensatory strategies for recognition- question only asked if the participant did not claim that compensatory strategies were ALWAYS successful)	S1Q4:Does your ability to successfully use compensatory cues decay if you do not regularly see that person?	S1Q5:Have you ever mistakenly thought that an unknown person is familiar when using compensatory cues to identity?	S1Q6: Why do you think these errors occurred? (error: erroneously 'recognising' someone from the use of compensatory cues. Question posed unless the participant stated that use of compensatory cues had NEVER led to recognition errors).	S2Q1: Have you ever spontaneously or automatically recognised a face without the need to apply compensatory or contextual cues (i.e. have you recognised a face in the same way as you might imagine a person without face recognition difficulties can, by "instantly knowing" who that person is from their face, without having to "work it out")?	S2Q2: For those individuals that you have previously managed to spontaneously recognise, can you successfully do this every time you see those particular faces?	S2Q3:Would you say that your spontaneous/automatic recognition of these people occurs as quickly as it does for people without face recognition difficulties?	S2Q4: Does your ability to spontaneously recognise a face decay if you do not regularly see that person?	S2Q5:Have you ever spontaneously recognised someone in error (i.e. the person didn't turn out to be the person that you thought it was)?	S2Q6: Why do you think these errors occurred? (reasons for why spontaneous or automatic recognition occurs, displayed only if the respondent did not answer 'Never' to the preceding question)
1	I can recognise the faces of MANY of the people that I know using compensatory cues	I FREQUENTLY recognise particular people without making errors	My strategies fail when clues like context are taken away, or when people change their hair style, or if I can't hear them speaking.	Sometimes	Frequently	Because I may see a person who fits a aparticular mental picture of someone I know, based on how I remeber their hairstyle, body shape and clothing. Often the mental picture I have becomes out of date as the person changes over time, but I don't update it in my mind so I always think of them as I did when I first met them, uness they are somebody I spend a lot of time with. When I think of people…	Occasionally	Sometimes	Rarely	Always	Sometimes	Before understanding the condition of prosopagnosia there was a feeling of wanting to "fit in" by recognising people they way others seem to do. Some people have similar features to others and if neither are well known to me they might as well be identical twins, though a non-faceblind person would be able to see the difference.
2	I can recognise the faces of SOME of the people that I know using compensatory cues	I FREQUENTLY recognise particular people without making errors	If I see a person out of context, I am much less likely to able to recognise them. Also, people change their hair, facial hair and make up!	Sometimes	Occasionally	People wearing clothes and having hair that's similar to someone I do know can confuse me. To be honest, I rarely make the first move any more as I'm too anxious about making mistakes.	Rarely	Sometimes	Don't know	Sometimes	Never
3	I can recognise the faces of SOME of the people that I know using compensatory cues	I FREQUENTLY recognise particular people without making errors	Sometimes people change the feature that I'm relying on. Also, sometimes another person B turns up with the same feature that I was relying on to identify A.	Always	Frequently	Usually because the stranger had some feature that I was using as a unique identifier for another person. Or even had a feature vaguely similar to one I was using. Unfortunately I am not very smart about my use of compensatory clues.	Frequently	Often	Often	Always	Sometimes	Basically, because I am an idiot when it comes to recognition. More nuancedly, sometimes two people just look identical to me. Interestingly those people do not always look identical (or even similar) to others. And people who are supposed to look identical, that is others say they look identical, do not always look identical to me. For example, one of my family members had an identical twin, but…
4	I can recognise the faces of SOME of the people that I know using compensatory cues	I SOMETIMES recognise particular people without making errors	Not specific enough to one person, can be true of a stranger	Often	Occasionally	when you are looking for someone you are not sure you will recognise it is easy to slot the wrong person in	Occasionally	Often	Sometimes	Often	Sometimes	Because you are looking for someone you expect to be there and someone vaguely similar can easily be imagined to be the right person
5	I can recognise the faces of MANY of the people that I know using compensatory cues	I SOMETIMES recognise particular people without making errors	The can be given to a number of people, such as black woman with braided hair, or white man with beard and glasses	Always	Very frequently	If they are far away and have a similar walk, frame and hair	Occasionally	Often	Rarely	Always	Very frequently	They look alike to me. For example I watched a film and just couldn't follow the plot. It turned out I thought it was the same actor but it was 2 male actors.
6	I can recognise the faces of SOME of the people that I know using compensatory cues	I FREQUENTLY recognise particular people without making errors	I use context a lot. If someone is out of context, I can't find the right cues to look for to identify them.	Always	Frequently	Identifying someone is a case of informed guessing. Sometimes you guess wrong. Sometimes the person has eg the right hair-style and age so you assume it is a particular person, but it isn't.	Occasionally	Sometimes	Often	Always	Sometimes	I rely on context. I might expect a person to be in a place or on a photo, so I spontaneously recognise the wrong person. My expectation is a stronger influence than recognition skills.
7	I can recognise the faces of MANY of the people that I know using compensatory cues	I SOMETIMES recognise particular people without making errors	Sometimes obvious things, like people change hairstyles or wear a different style of clothes (eg seeing someone from work out of context, wearing jeans & tshirt instead of office clothes.) Sometimes people's distinguishing features aren't distinct enough for a 100% match every time	Always	Frequently	Because people have had similar hairstyle/ body type/ clothes/ gait to people who I really do know.	Occasionally	Often	Don't know	Sometimes	Rarely	It would mostly be family and very close friends - occasionally I might see someone who looks like one of them, and I know that usually, given the context, it's unlikely to be. It happens less frequently the other way around, ie seeing someone I'd expect to recognise automatically and not recognising them. That's only happened a handful of times, and always when I've seen the person hugely out of…
8	I can recognise the faces of SOME of the people that I know using compensatory cues	I FREQUENTLY recognise particular people without making errors	The most common reason is that people change their hairstyle or colour. Sometimes, though, I fail to recognise a person but I do not know why.	Always	Occasionally	If I am using hairstyle, I can be fooled when two people have very similar hairstyles. Also similar glasses can be a problem.	Occasionally	Often	Often	Always	Rarely	When they are members of the same family, or when they just happen to have similarly shaped faces.
9	I can recognise the faces of MANY of the people that I know using compensatory cues	I SOMETIMES recognise particular people without making errors	If the person is out of context. If they have changed their hairstyle	Often	Never		Frequently	Often	Often	Sometimes	Rarely	similar hairstyle and facial features
10	I can recognise the faces of SOME of the people that I know using compensatory cues	I FREQUENTLY recognise particular people without making errors	People change their appearance or are out of context	Always	Occasionally	Similarities in appearance with respect to non facial features	Rarely	Sometimes	Never	Always	Sometimes	Misleading contextual clues
11	I can recognise the faces of MANY of the people that I know using compensatory cues	I FREQUENTLY recognise particular people without making errors	Some people look too similar to others, and some change their hairstyle. If it has been a long time since I last saw the person that is more difficult, they may have changed appearance (look older).	Always	Occasionally	I assume I know them and try to think who they might look like. I tend to look at hair and mouth shape so if there is someone that looks similar I will mistake for them.	Occasionally	Often	Rarely	Always	Frequently	Looks similar to the person I thought it was. Same face shape/age/sex/colour and similar hair style.
12	I can recognise the faces of SOME of the people that I know using compensatory cues	I FREQUENTLY recognise particular people without making errors	When see people in unexpected context	Often	Frequently	Some similarity to familar person (hair, clothes) and seeing them in an unfamilar context	Occasionally	Often	Often	Often	Sometimes	Similar hairstyles, clothing.
13	I can recognise the faces of MANY of the people that I know using compensatory cues	I FREQUENTLY recognise particular people without making errors	seeing someone where I don't expect	Sometimes	Never		Very frequently	Always	Always	Sometimes	Rarely	forget what the face looks like
14	I can recognise the faces of FEW of the people that I know using compensatory cues	I RARELY recognise particular people without making errors	Anyone with similar features is likely to identified as the same person	Often	Frequently	Lots of people have similar features - hair etc - and I will often ask my wife 'is that Ruth off Spooks' just because and actress has dark shoulder-length hair and an English accent. It normally is not.	Rarely	Sometimes	Sometimes	Often	Frequently	Similar features shared between people
15	I can recognise the faces of SOME of the people that I know using compensatory cues	I SOMETIMES recognise particular people without making errors	IF THE PERSON IS OUT OF CONTEXT E.G A WORK COLLEAGUE OUT SHOPPING	Always	Occasionally	THE PERSON WAS OUT OF CONTEXT BUT LOOKED VAGUELY FAMILIAR AND SHARED SOME CHARACTERISTIC	Frequently	Always	Sometimes	Always	Rarely	HAVEN'T SEEN THEM FOR A WHILE BUT IT WAS A PLACE THEY MIGHT HAVE USUALLY BEEN
16	I can recognise the faces of SOME of the people that I know using compensatory cues	I SOMETIMES recognise particular people without making errors	Changes in their hairstyle, dress, weight etc. Seeing people out of uniform when I normally see the in uniform. Lack of memory on my part.	Often	Occasionally	Usually if I haven’t seen the person for some time and my isn’t 100%accurate or has ‘decayed’	Rarely	Sometimes	Never	Often	Sometimes	As previous answer
17	I can recognise the faces of SOME of the people that I know using compensatory cues	I SOMETIMES recognise particular people without making errors	because people change their appearance, or have similar features (e.g. long dark hair)	Often	Occasionally	the person was not where I expected them to be, or looked very similar to who I thought they were (style etc)	Occasionally	Often	Rarely	Always	Sometimes	because they looked similar to the other person
18	I can recognise the faces of SOME of the people that I know using compensatory cues	I FREQUENTLY recognise particular people without making errors	If someone else has a similar distinguishing feature i.e. a stranger with a mole in the same place. Alternatively, if the person I know has changed their appearance i.e. worn makeup or a scarf that covers the mole.	Often	Frequently	The stranger falls into the rough bracket I've made for the person I know.	Occasionally	Often	Sometimes	Rarely	Rarely	The recognition is so quick that I'm not sure why it went wrong. But I would guess that my mind has taken the environment, face and other factors into account and matched a person that I usually recognise well, and I haven't done any manual processing to check that the identification is correct. Perhaps the person is in an unusual environment and I've used that in the automatic recognition.
19	I can recognise the faces of MANY of the people that I know using compensatory cues	I FREQUENTLY recognise particular people without making errors	When people are not in context almost always. Also when I haven't seen someone a few times and haven't committed their features to memory. When specific features change, this can sometimes be a challenge e.g change in hair style or colour or people from running club who I meet out of context not wearing running clothes!	Often	Occasionally	Similar physical characteristics	Very frequently	Often	Often	Often	Rarely	Unsure
20	I can recognise the faces of MANY of the people that I know using compensatory cues	I FREQUENTLY recognise particular people without making errors	Often it's because of a context change, like seeing a co-worker outside of work or when I'm not expecting to see them. I also find it harder when I'm tired or not feeling well, usually because I'm not paying as much attention. I find I use peoples voices a lot, as well as the context of the first couple things that they say to me, so if I don't get to speak to them (if they just wave at me across…	Often	Occasionally	Sometimes if people look similar, or if I've primed myself to see that person (for example I know I'm meeting them so I'm looking for them) I can sometimes think I've seen them when I haven't.	Occasionally	Often	Don't know	Often	Rarely	It doesn't happen often but something that has been happening recently is seeing people with/without masks is causing me to make more errors. If people look similar (for example, they're related) and I get that recognition feeling with them, I have recognised their face I've just failed to remember the person I have recognised.
21	I can recognise the faces of MANY of the people that I know using compensatory cues	I SOMETIMES recognise particular people without making errors	Confidence to approach	Often	Occasionally	Not suer	Frequently	Often	Sometimes	Always	Sometimes	Memory
22	I can recognise the faces of MANY of the people that I know using compensatory cues	I SOMETIMES recognise particular people without making errors	Eye contact and the voice are my best strategies for recognition. I usually fail if I am relying on the visual like hair style, hair colour, glasses, prominent facial features, their gait, or distinctive features.	Sometimes	Frequently	If I don't hear their voice or make eye contact, my accuracy on the basis of visual alone is not great.	Occasionally	Rarely	Never	Often	Frequently	Because my non visual strategies are not very accurate. If I hear a voice or sense someone's energy, or make eye contact, this is more often accurate. Errors usually happen if I reply on the visual clues.
23	I can recognise the faces of MANY of the people that I know using compensatory cues	I ALWAYS recognise particular people without making errors		Sometimes	Rarely	If people look similar	Very frequently	Often	Often	Sometimes	Rarely	Similar looking people. People I know less well
