# Supplementary material for: Why can people with developmental prosopagnosia recognise some familiar faces? Insights from subjective experience
Source: PeerJ. 2023 Jul 18;11:e15497. doi: 10.7717/peerj.15497 (PMC10361072; doi:10.7717/peerj.15497)
Supplement: Supplemental Information 3 — For controls: accuracy data for the familiar face recognition task (sheet 1); For DPs: accuracy data for the familiar face recognition task (sheet 2); reason-for-recognition proportional endorsement rates (sheet 3) [file peerj-11-15497-s003.xlsx]

## Sheet: Control pts_overall acc
Participant	Sex	Age	A % fam correct	A % ID correct	A % Distractors correct
C01	F	33	97.9798	96.9697	100
C02	F	33	98	98	97
C03	F	34	88.2353	86.7647	99
C04	F	30	87.013	76.6234	89
C05	F	53	94.9495	72.7273	99
C06	F	53	83.5294	60	98
C07	F	52	100	100	98
C08	F	53	95.8333	91.6667	100
C09	F	51	97.619	97.619	99
C10	F	54	93.5484	84.9462	99
C11	F	52	98.7805	91.4634	98
C12	F	54	97.7528	94.382	97
C13	F	30	100	99	100
C14	F	32	99	97	94
C15	F	40	98.9899	97.9798	100
C16	M	30	91.3978	86.0215	99
C17	M	30	86.0465	66.2791	92
C18	M	54	93.4783	76.087	99
C19	M	55	93.9394	82.8283	84
C20	M	49	94.5652	93.4783	100
C21	M	33	100	97	93
C22	M	43	98	98	100
C23	M	32	99	96	100
C24	M	52	98.9899	91.9192	100
C25	M	39	98.8764	95.5056	98
C26	M	40	100	98.7654	98
C27	M	45	92.6316	86.3158	99
C28	M	38	96.25	95	98
C29	F	39	100	96.875	99
C30	F	40	95.8763	88.6598	100
C31	F	43	96.9388	95.9184	94
C32	F	31	97	95	99
C33	M	32	93.8776	89.7959	98
C34	M	34	98	94	97
C35	M	47	98	96	95
C36	M	54	92.1053	90.7895	100
C37	M	54	98.8235	97.6471	88
C38	M	52	94.5055	92.3077	100
C39	M	48	100	97.6471	98
C40	M	31	89.6907	87.6289	97
C41	F	37	95.7895	89.4737	98
C42	F	58	97.7273	92.0455	94
C43	F	56	98.5714	75.7143	98
C44	F	59	92.0455	89.7727	97
C45	F	64	91.4634	80.4878	94
C46	F	59	91.954	85.0575	88
C47	M	62	93.2584	82.0225	89
C48	F	65	84.0909	62.5	96
C49	F	58	93.2584	92.1348	97
	Mean	45.2449	95.2527	89.3841	96.7959
	SD	10.7984	4.29351	9.63366	3.7748

## Sheet: DP pts_overall acc
Participant	Sex	Age	A % fam correct	A % ID correct	A % Distractors correct	A% ID via compensatory mechanisms	A% ID via spontaneous mechanisms
Pt1	F	33	92	81	88	33	48
Pt2	F	36	52	39	98	19	20
Pt3	F	53	21	19	87	19	0
Pt4	F	58	39	28	94	28	0
Pt5	F	49	55	47	99	42	5
Pt6	F	50	57	51	95	51	0
Pt7	F	53	35	31	85	31	0
Pt8	F	53	28	20	81	6	14
Pt9	F	57	49	42	99	41	1
Pt10	M	55	55	34	80	32	2
Pt11	F	49	82	64	99	50	14
Pt12	M	42	28	26	95	26	0
Pt13	F	38	44	33	98	21	12
Pt14	M	50	59	59	99	32	27
Pt15	F	52	74	56	96	36	20
Pt16	F	52	36	20	65	18	2
Pt17	F	30	16	14	100	14	0
Pt18	F	26	27	22	100	20	2
Pt19	F	55	60	50	90	49	1
Pt20	F	22	41	33	99	33	0
Pt21	F	50	90	82	96	1	81
Pt22	F	52	40	37	100	32	5
Pt23	F	59	85	70	92	24	46
	Mean	46.6957	50.6522	41.6522	92.8261	28.6087	13.0435
	SD	10.632	22.0714	19.7199	8.6216	13.1174	20.4461

## Sheet: DP_reasons for recog
pt_no	categorisation_only_enough times	categorisation_only_spontaneous	categorisation_only_vague	categorisation_only_overall	categorisation_only_distinctive	categorisation_only_image	categorisation_only_emotion	Identification_enough times	Identification_spontaneous	Identification_vague	Identification_overall	Identification_distinctive	Identification_image	Identification_emotion	Familiar_False Alarm_identification__enough times	Familiar_False Alarm_identification__spontaneous	Familiar_False Alarm_identification__vague	Familiar_False Alarm_identification__overall	Familiar_False Alarm_identification__distinctive	Familiar_False Alarm_identification__image	Familiar_False Alarm_identification__emotion	Distractor_False Alarm_categorisation__enough times	Distractor_False alarm_Categorisation_spontaneous	Distractor_False Alarm_categorisation__vague	Distractor_False Alarm_categorisation__overall	Distractor_False Alarm_categorisation__distinctive	Distractor_False Alarm_categorisation__image	Distractor_False Alarm_categorisation__emotion	Distractor_False Alarm_Identification__enough times	Distractor_False Alarm_Identification__spontaneous	Distractor_False Alarm_Identification__FAID_vague	Distractor_False Alarm_Identification__overall	Distractor_False Alarm_Identification__distinctive	Distractor_False Alarm_Identification__image	Distractor_False Alarm_Identification__emotion	Familiar_SPONTANEOUS_coreason_enough times	Familiar_SPONTANEOUS_coreason_vague	Familiar_SPONTANEOUS_coreason_overall	Familiar_SPONTANEOUS_coreason_distinctive	Familiar_SPONTANEOUS_coreason_image	Familiar_SPONTANEOUS_coreason_emotion	Familiar_COMPENSATED_enough times	Familiar_COMPENSATED_vague	Familiar_COMPENSATED_overall	Familiar_COMPENSATED_distinctive	Familiar_COMPENSATED_image	Familiar_COMPENSATED_emotion
Pt1	0	0	100	0	0	0	0	80.9006	59.3168	27.1222	43.5559	16.5114	1.08696	0	no instances	no instances	no instances	no instances	no instances	no instances	no instances	0	0	100	0	0	0	0	0	0	100	0	0	0	0	100	5.60606	68.7771	20.8658	0	0	55.5556	72.9167	9.02778	9.72222	0	0
Pt2	0	0	100	0	0	0	0	27.8045	47.6763	17.3878	72.516	16.5064	1.92308	11.2981	0	0	50	50	0	0	0	0	0	100	0	0	0	0	no instances	no instances	no instances	no instances	no instances	no instances	no instances	20.5357	0	89.7321	15.0298	0	11.9048	26.25	31.25	63.75	16.25	5	11.25
Pt3	0	0	100	0	0	0	0	92.8571	0	15.4762	34.8214	0	25	0	100	0	0	0	0	0	0	0	0	66.6667	0	0	33.3333	0	no instances	no instances	no instances	no instances	no instances	no instances	no instances	no instances	no instances	no instances	no instances	no instances	no instances	92.8571	15.4762	34.8214	0	25	0
Pt4	0	0	100	0	0	0	0	38.5417	0	18.4028	66.6667	52.7778	0	9.02778	16.6667	0	72.2222	44.4444	27.7778	0	0	0	0	100	0	50	0	0	0	0	100	0	50	0	0	no instances	no instances	no instances	no instances	no instances	no instances	38.5417	18.4028	66.6667	52.7778	0	9.02778
Pt5	0	0	87.5	12.5	0	12.5	0	70.3632	9.42308	9.9359	47.9274	45.7265	18.8034	1.66667	0	0	100	0	0	0	0	no instances	no instances	no instances	no instances	no instances	no instances	no instances	0	0	100	0	0	0	0	77.7778	0	88.8889	44.4444	66.6667	11.1111	69.4444	22.2222	44.4444	37.5	15.9722	0
Pt6	0	0	75	0	0	25	0	30.8852	0	29.1606	5.11905	22.1795	16.2637	3.57143	100	0	0	0	0	0	0	0	0	100	0	0	0	0	0	0	100	0	0	0	0	no instances	no instances	no instances	no instances	no instances	no instances	30.8852	29.1606	5.11905	22.1795	16.2637	3.57143
Pt7	0	0	66.6667	0	66.6667	33.3333	0	72.9167	0	7.29167	0	71.5774	0	0	no instances	no instances	no instances	no instances	no instances	no instances	no instances	0	0	75.7576	0	21.2121	30.303	0	0	0	100	0	0	0	0	no instances	no instances	no instances	no instances	no instances	no instances	72.9167	7.29167	0	71.5774	0	0
Pt8	0	0	100	0	0	0	0	61.9643	70.3571	11.25	3.57143	26.7857	0	8.57143	no instances	no instances	no instances	no instances	no instances	no instances	no instances	0	0	100	0	0	0	12.5	0	0	50	0	33.3333	0	0	56.6667	0	5	5	0	5	50	66.6667	0	33.3333	0	16.6667
Pt9	0	0	50	0	0	0	0	80.4327	2.5	2.27273	13.5708	5.76923	0	0	0	0	100	0	0	0	0	no instances	no instances	no instances	no instances	no instances	no instances	no instances	100	0	0	0	0	0	0	0	0	0	0	0	0	82.9327	2.27273	13.5708	5.76923	0	0
Pt10	0	0	88.6905	0	19.2857	0	0	89.4872	3.84615	21.0256	21.9231	27.9487	0	0	0	0	100	0	0	0	0	0	0	87.5	0	12.5	0	0	16.6667	0	100	0	0	5.55556	0	100	0	50	50	0	0	88.7879	22.4242	20	27.4242	0	0
Pt11	0	0	100	0	0	0	0	56.6855	21.734	43.3145	53.7443	52.2624	1.78571	16.1991	no instances	no instances	no instances	no instances	no instances	no instances	no instances	0	0	100	0	0	0	0	no instances	no instances	no instances	no instances	no instances	no instances	no instances	88.75	0	100	93.75	5	50	45.4193	58.9209	40.0107	40.5716	0	8.69391
Pt12	0	0	50	0	0	50	0	76.5476	0	23.4524	0	11.9048	43.0357	23.1548	no instances	no instances	no instances	no instances	no instances	no instances	no instances	0	0	88.8889	0	0	22.2222	0	no instances	no instances	no instances	no instances	no instances	no instances	no instances	no instances	no instances	no instances	no instances	no instances	no instances	71.5476	23.4524	0	11.9048	38.0357	23.1548
Pt13	0	0	100	0	0	6.66667	0	70.9821	38.244	39.7321	42.4107	36.1607	53.2738	0	no instances	no instances	no instances	no instances	no instances	no instances	no instances	0	0	100	0	0	0	0	no instances	no instances	no instances	no instances	no instances	no instances	no instances	100	6.25	72.9167	45.8333	72.9167	0	45.3869	62.9464	17.4107	34.0774	45.9821	0
Pt14	no instances	no instances	no instances	no instances	no instances	no instances	no instances	77.9178	41.6973	16.6722	7.48663	16.1759	0	6.36642	no instances	no instances	no instances	no instances	no instances	no instances	no instances	no instances	no instances	no instances	no instances	no instances	no instances	no instances	0	0	100	0	0	0	0	96.9697	0	6.06061	27.8788	0	19.3939	62.1212	30.8333	4.54545	4.77273	0	0
Pt15	0	0	96.875	0	0	0	0	66.1996	36.1996	14.2033	37.7289	31.9597	1.78571	0	no instances	no instances	no instances	no instances	no instances	no instances	no instances	0	0	100	0	0	0	0	no instances	no instances	no instances	no instances	no instances	no instances	no instances	54.4643	0	58.9286	23.8095	0	0	75.7576	22.822	19.8864	34.8485	2.27273	0
Pt16	0	0	43.75	0	0	62.5	0	63.2143	10	39.5238	59.6429	21.9048	32.1429	27.5	50	0	25	100	25	25	50	0	0	39.2767	2.77778	0	69.0566	0	0	0	66.6667	0	0	66.6667	0	50	0	0	50	0	50	64.881	42.8571	69.6429	20.2381	32.1429	29.1667
Pt17	0	0	50	0	0	0	0	87.5	0	16.0714	33.3333	45.2381	0	16.0714	no instances	no instances	no instances	no instances	no instances	no instances	no instances	no instances	no instances	no instances	no instances	no instances	no instances	no instances	no instances	no instances	no instances	no instances	no instances	no instances	no instances	no instances	no instances	no instances	no instances	no instances	no instances	87.5	16.0714	33.3333	45.2381	0	16.0714
Pt18	0	0	100	0	0	0	0	23.75	11.4583	28.5417	56.875	59.7917	58.9583	21.4583	no instances	no instances	no instances	no instances	no instances	no instances	no instances	no instances	no instances	no instances	no instances	no instances	no instances	no instances	no instances	no instances	no instances	no instances	no instances	no instances	no instances	100	0	100	100	100	100	12.7381	29.881	54.6429	50.119	53.4524	10
Pt19	0	0	75	0	0	16.6667	0	37.0116	1.78571	35.3175	18.4676	25.4731	10.7143	0	50	0	50	0	0	50	0	0	0	100	0	16.6667	0	0	0	0	100	0	0	0	0	100	0	0	100	0	0	35.9127	36.1416	18.7424	24.2369	11.2637	0
Pt20	0	0	95	0	0	0	0	94.9495	0	5.05051	11.9048	6.34921	0	28.7338	no instances	no instances	no instances	no instances	no instances	no instances	no instances	0	0	100	0	0	0	0	no instances	no instances	no instances	no instances	no instances	no instances	no instances	no instances	no instances	no instances	no instances	no instances	no instances	94.9495	5.05051	11.9048	6.34921	8.33333	28.7338
Pt21	0	0	87.5	12.5	12.5	25	0	93.9286	98.8095	0	98.75	98.75	98.75	1.31579	no instances	no instances	no instances	no instances	no instances	no instances	no instances	0	0	100	0	0	0	0	no instances	no instances	no instances	no instances	no instances	no instances	no instances	95	0	98.75	98.75	98.75	1.31579	0	0	100	100	100	0
Pt22	0	0	100	0	100	0	0	54.8802	12.8739	54.5444	22.9968	59.5696	4.70085	43.4333	0	0	100	0	0	0	0	no instances	no instances	no instances	no instances	no instances	no instances	no instances	no instances	no instances	no instances	no instances	no instances	no instances	no instances	83.3333	16.6667	16.6667	50	0	0	53.4767	56.6423	24.9053	62.3377	5.39773	49.1613
Pt23	0	0	75	0	0	0	0	95.4762	65.3383	2.85714	61.1529	2.38095	0	7.50627	50	0	25	25	0	0	0	0	0	100	0	0	0	0	66.6667	0	33.3333	11.1111	0	0	0	100	0	86.5625	2.08333	0	6.77083	97.2222	7.77778	14.2857	2.77778	0	10
MEAN	0	0	83.681	1.13636	9.02056	10.5303	0	67.1824	23.0983	20.809	35.3985	32.7697	16.0098	9.82063	33.3333	0	56.5657	19.9495	4.79798	6.81818	4.54545	0	0	91.6523	0.163399	5.90463	9.11266	0.735294	15.2778	0	79.1667	0.925926	6.94444	6.01852	0	76.4686	1.78267	52.6427	45.4653	21.4583	15.9685	58.9167	29.6296	28.9874	31.0437	15.6138	9.36946
SE	0	0	4.23	0.784165	5.34168	3.83827	0	4.71962	5.96382	3.01789	5.5464	5.15186	5.34335	2.50066	11.8918	0	12.1617	9.87306	3.22403	4.87446	4.54545	0	0	4.05895	0.163399	3.20345	4.64961	0.735294	9.50331	0	9.86547	0.925926	4.79299	5.53271	0	7.86304	1.11322	10.2504	8.91578	9.6113	6.96239	5.60315	4.46181	5.56076	5.17908	5.11614	2.68309
